# Supplementary material
Source: publisher site journal article supplement (https://www.dovepress.com/article/248469)
Supplement: Supplementary file 1 [file get_supplementary_file.php]

SUPPLEMENTARY FILE – Laboratorial activities in detail and input parameters

| **Activity** | **Chemicals used** | **Hazard statements** | **Input parameters** |
| --- | --- | --- | --- |
| Activity 1: Detection of Legionella spp | mercaptoethanol | H301; H331; H315; H310; H318; H317 | Boiling point: 157°C  Physical state: Liquid  Quantity: 10ml  Type of use: controlled use  Type of control: localized extraction  Exposure time: <15 minutes  Temperature of use: 20°C  Distance from operator: less than 1 meter  Frequency of use: 3-4 times per week |
| methanol | H301, H311, H331, H370 | Boiling point: 64,7 °C  Physical state: liquid  Quantity: 200 ml  Type of use: controlled use  Type of control: localized extraction  Exposure time: <15 minutes  Temperature of use: 20°C  Distance from operator: less than 1 meter  Frequency of use: 3-4 times per week |
| ethanol | H319 | Boiling point: 78°C  Physical state: liquid  Quantity: 500 ml  Type of use: controlled use  Type of control: localized extraction  Exposure time: <15 minutes  Temperature of use: 20°C  Distance from operator: less than 1 meter  Frequency of use: 3-4 times per week |
| acetic acid | H314 | Boiling point: 116°C  Physical state: liquid  Quantity: 200 ml  Type of use: controlled use  Type of control: localized extraction  Exposure time: <15 minutes  Temperature of use: 20°C  Distance from operator: less than 1 meter  Frequency of use: 3-4 times per week |
| Activity 2: Manipulation of tumor cells | Sodium hypochlorite | H314, H315, H319 | Boiling point: 98°C  Physical state: liquid  Quantity: 200 ml  Type of use: controlled use  Type of control: localized extraction  Exposure time: <15 minutes  Temperature of use: 20°C  Distance from operator: less than 1 meter  Frequency of use: once a week |
| ethanol | H319 | Boiling point: 78°C  Physical state: liquid  Quantity: 50 ml  Type of use: controlled use  Type of control: localized extraction  Exposure time: <15 minutes  Temperature of use: 20°C  Distance from operator: less than 1 meter  Frequency of use: once a week |
| Activity 3: extraction and separation of cellular proteins | Phenol | H301, H331, H311, H314, H341, H373 | Boiling point: 182°C  Physical state: liquid  Quantity: 5 ml  Type of use: controlled use  Type of control: localized extraction  Exposure time: around 1 hour  Temperature of use: 20°C  Distance from operator: less than 1 meter  Frequency of use: 4-5 times per week |
| hydrochloric acid | H314, H318, H335 | Vapour pressure: 12000pa  Physical state: liquid  Quantity: 5 ml  Type of use: controlled use  Type of control: localized extraction  Exposure time: around 1 hour  Temperature of use: 20°C  Distance from operator: less than 1 meter  Frequency of use: 4-5 times per week |
| trichloromethane | H302, H315, H319, H331, H351, H361, H372 | Boiling point: 61°C  Physical state: liquid  Quantity: 5 ml  Type of use: controlled use  Type of control: localized extraction  Exposure time: around 1 hour  Temperature of use: 20°C  Distance from operator: less than 1 meter  Frequency of use: 4-5 times per week |
| acetic acid | H314 | Boiling point: 116°C  Physical state: liquid  Quantity: 50 ml  Type of use: controlled use  Type of control: localized extraction  Exposure time: around 1 hour  Temperature of use: 20°C  Distance from operator: less than 1 meter  Frequency of use: 4-5 times per week |
| methanol | H301, H311, H331, H370 | Boiling point: 64,7°C  Physical state: liquid  Quantity: 200 ml  Type of use: controlled use  Type of control: localized extraction  Exposure time: around 1 hour  Temperature of use: 20°C  Distance from operator: less than 1 meter  Frequency of use: 4-5 times per week |
